# Supplementary material for: Artificial Neural Network Individualised Prediction of Time to Colorectal Cancer Surgery
Source: PubMed Central journal article supplement (PMC6652036; doi:10.1155/2019/1285931), 2019-07-09

## Supplementary Description:

Supplementary Figure 1a-c ROC gain and lift charts for the four-week ANN analysis. ANN modelling is shown to lack clinical utility for this timepoint. DtL – Diagnosis to laparoscopy.

Supplementary Figure 2 The neuronal links and strengths for the twelve-week ANN. Overall results are similar to the 8-week model although the relative importance of individual factors differs (table 2). ANN behaviour and interaction between the layers is explained in the figure 1 legend.

Supplementary figure 1a-c

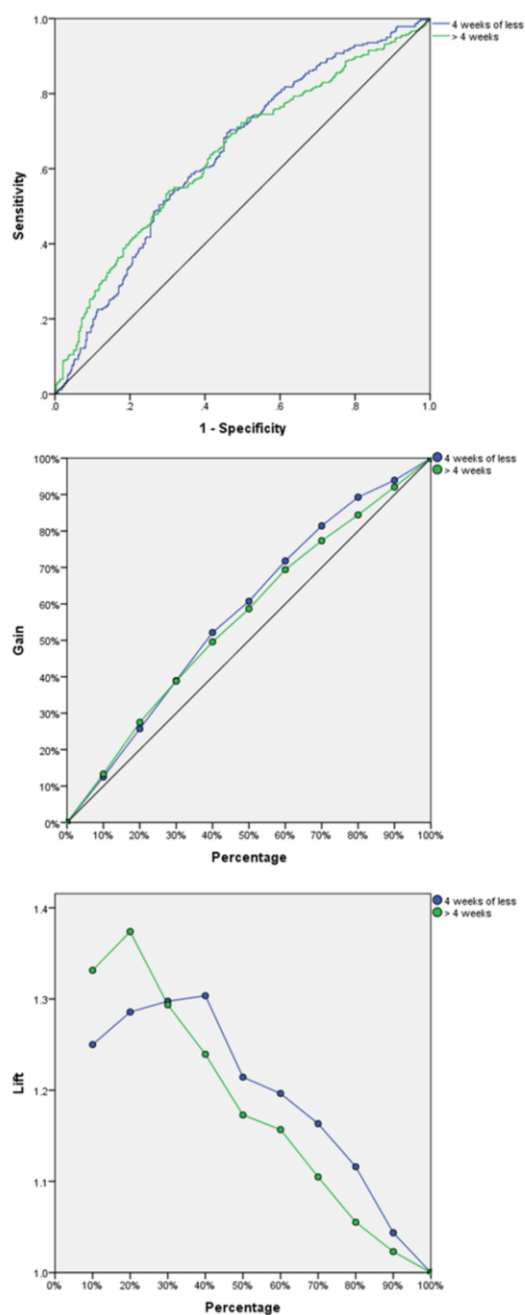

Supplementary figure 2

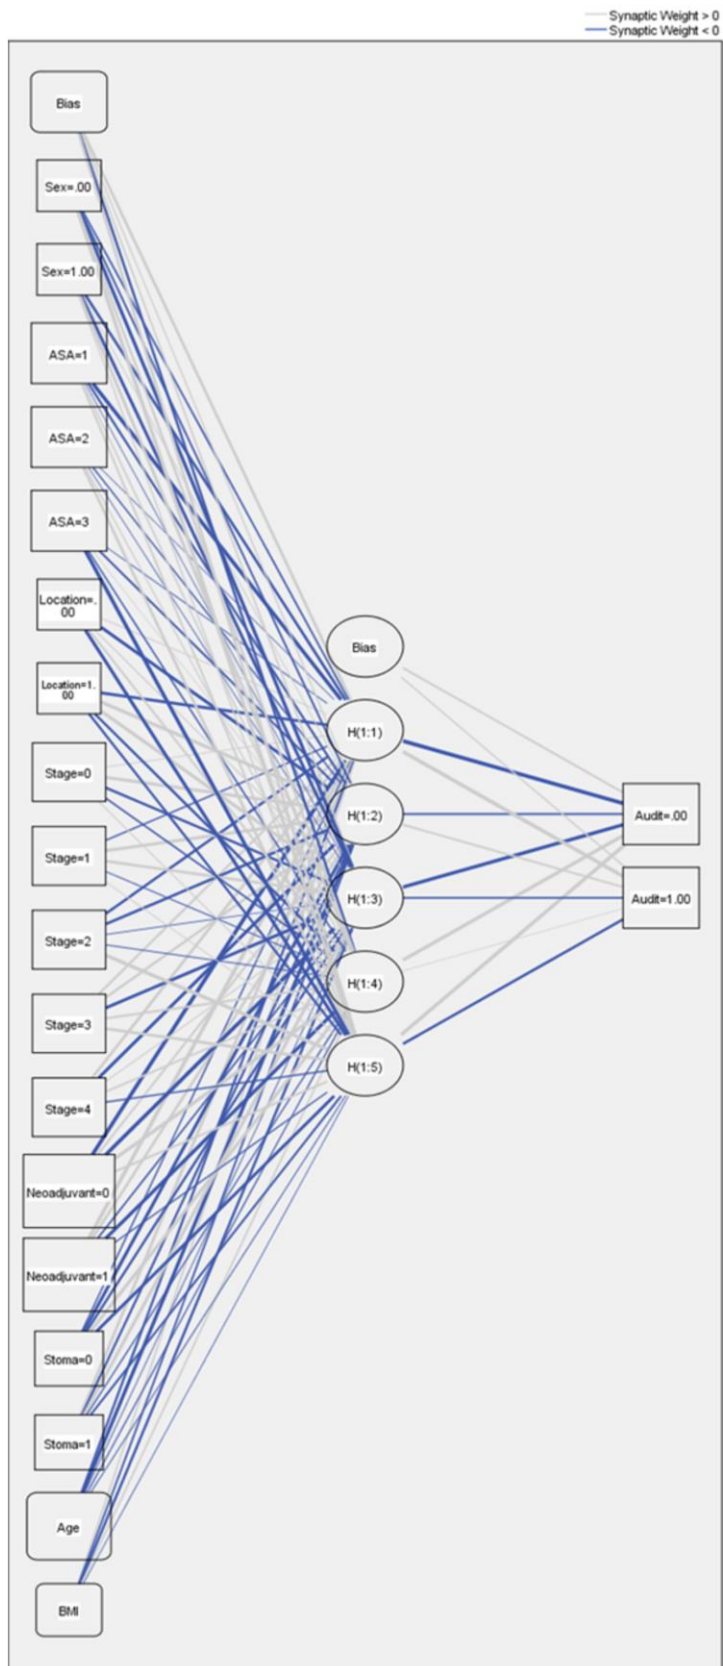

Supplement: 1285931.f1.pdf [file 1285931.f1.pdf]
